# Supplementary material
Source: HighWire-hosted journal article supplement (https://bmjopen.bmj.com/content/11/1/e033290)
Supplement: inline-supplementary-material-1 [file inline-supplementary-material-1.pdf]

**Supplementary material 1. SPSS Syntax file used for the cluster analysis**

```
CLUSTER  
Age_REC_5cat_2  
SexMen_number_REC_4cat  
MCLUB  
REC_CondomLast_Male  
SubsSex_Alc  
SubsSex_Pop  
/METHOD BAVERAGE  
/MEASURE=SEUCLID  
/PRINT SCHEDULE CLUSTER(4,9)  
/PRINT DISTANCE  
/PLOT VICICLE  
/SAVE CLUSTER(4,9).
```
