# Supplementary material
Source: HighWire-hosted journal article supplement (https://bmjopen.bmj.com/content/11/1/e033290)
Supplement: inline-supplementary-material-3 [file inline-supplementary-material-3.pdf]

Tab. 1a Adjusted Odds Ratios from a multivariable logistic regression for self-reported previous STI (diagnosed positive)

| Previous STI                                                          | Odds Ratio  | p-value | 95% CI |       |
|-----------------------------------------------------------------------|-------------|---------|--------|-------|
| Age group                                                             |             |         |        |       |
| 18-20                                                                 | ref.        |         |        |       |
| 21-30                                                                 | 1.55        | 0.313   | 0.66   | 3.61  |
| 31-40                                                                 | <b>2.59</b> | 0.029   | 1.10   | 6.07  |
| 41-50                                                                 | <b>2.96</b> | 0.023   | 1.16   | 7.54  |
| >50                                                                   | <b>4.74</b> | 0.006   | 1.56   | 14.48 |
| Number of sexual male partners in the last 12 months                  |             |         |        |       |
| 1                                                                     | ref.        |         |        |       |
| 2-4                                                                   | 0.72        | 0.289   | 0.40   | 1.32  |
| 5-12                                                                  | <b>1.66</b> | 0.091   | 0.92   | 3.00  |
| >12                                                                   | <b>2.60</b> | 0.002   | 1.42   | 4.73  |
| Frequency of visiting gay clubs, bars, discos to meet sexual partners |             |         |        |       |
| Many times                                                            | ref.        |         |        |       |
| Sometimes                                                             | 1.09        | 0.776   | 0.60   | 1.98  |
| Rarely                                                                | 1.52        | 0.173   | 0.83   | 2.79  |
| Doesn't visit                                                         | 0.98        | 0.955   | 0.48   | 2.01  |
| Condom use in last sexual intercourse                                 |             |         |        |       |
| No                                                                    | ref.        |         |        |       |
| Yes                                                                   | <b>0.48</b> | 0.001   | 0.31   | 0.75  |
| Popper use before or during last sexual intercourse                   |             |         |        |       |
| No                                                                    | ref.        |         |        |       |
| Yes                                                                   | 1.34        | 0.346   | 0.73   | 2.45  |
| Alcohol use before or during last sexual intercourse                  |             |         |        |       |
| No                                                                    | ref.        |         |        |       |
| Yes                                                                   | 1.29        | 0.237   | 0.85   | 1.95  |

Tab. 2a Adjusted Odds Ratios from a multivariable MIXED EFFECT logistic regression for self-reported previous STI (diagnosed positive) with age group as a random effect

| Previous STI                                                          | Odds Ratio | p-value | 95% CI |      |
|-----------------------------------------------------------------------|------------|---------|--------|------|
| FIXED EFFECT                                                          |            |         |        |      |
| Number of sexual male partners in the last 12 months                  |            |         |        |      |
| 1                                                                     | ref.       |         |        |      |
| 2-4                                                                   | 0.73       | 0.302   | 0.40   | 1.33 |
| 5-12                                                                  | 1.67       | 0.086   | 0.93   | 3.01 |
| >12                                                                   | 2.68       | 0.001   | 1.47   | 4.89 |
| Frequency of visiting gay clubs, bars, discos to meet sexual partners |            |         |        |      |
| Many times                                                            | ref.       |         |        |      |
| Sometimes                                                             | 1.10       | 0.750   | 0.61   | 2.00 |
| Rarely                                                                | 1.55       | 0.156   | 0.85   | 2.83 |
| Doesn't visit                                                         | 1.02       | 0.953   | 0.50   | 2.09 |
| Condom use in last sexual intercourse                                 |            |         |        |      |
| No                                                                    | ref.       |         |        |      |
| Yes                                                                   | 0.47       | 0.001   | 0.30   | 0.74 |
| Popper use before or during last sexual intercourse                   |            |         |        |      |
| No                                                                    | ref.       |         |        |      |
| Yes                                                                   | 1.34       | 0.343   | 0.73   | 2.44 |
| Alcohol use before or during last sexual intercourse                  |            |         |        |      |
| No                                                                    | ref.       |         |        |      |
| Yes                                                                   | 1.29       | 0.224   | 0.85   | 1.96 |
| RANDOM EFFECT                                                         |            |         |        |      |
| AGE GROUP (var)                                                       | 0.11       |         | 0.01   | 1.18 |

Tab. 3a Adjusted Odds Ratios from a multivariable MIXED EFFECT logistic regression for self-reported previous STI (diagnosed positive) with number of sexual male partners in the last 12 months as a random effect

| Previous STI                                                          | Odds Ratio | p-value | 95% CI |       |
|-----------------------------------------------------------------------|------------|---------|--------|-------|
| FIXED EFFECT                                                          |            |         |        |       |
| Age group                                                             |            |         |        |       |
| 18-20                                                                 | ref.       |         |        |       |
| 21-30                                                                 | 1.56       | 0.303   | 0.67   | 3.64  |
| 31-40                                                                 | 2.65       | 0.024   | 1.13   | 6.22  |
| 41-50                                                                 | 3.04       | 0.020   | 1.20   | 7.75  |
| >50                                                                   | 4.76       | 0.006   | 1.57   | 14.45 |
| Frequency of visiting gay clubs, bars, discos to meet sexual partners |            |         |        |       |
| Many times                                                            | ref.       |         |        |       |
| Sometimes                                                             | 1.08       | 0.806   | 0.59   | 1.96  |
| Rarely                                                                | 1.47       | 0.216   | 0.80   | 2.68  |
| Doesn't visit                                                         | 0.91       | 0.794   | 0.44   | 1.86  |
| Condom use in last sexual intercourse                                 |            |         |        |       |
| No                                                                    | ref.       |         |        |       |
| Yes                                                                   | 0.50       | 0.002   | 0.32   | 0.78  |
| Popper use before or during last sexual intercourse                   |            |         |        |       |
| No                                                                    | ref.       |         |        |       |
| Yes                                                                   | 1.40       | 0.270   | 0.77   | 2.57  |
| Alcohol use before or during last sexual intercourse                  |            |         |        |       |
| No                                                                    | ref.       |         |        |       |
| Yes                                                                   | 1.30       | 0.219   | 0.86   | 1.97  |
| RANDOM EFFECT                                                         |            |         |        |       |
| Number of sexual male partners in the last 12 months (var)            | 0.19       |         | 0.03   | 1.04  |

Tab. 4a Adjusted Odds Ratios from a multivariable MIXED EFFECT logistic regression for self-reported previous STI (diagnosed positive) with condom use in last sexual intercourse as a random effect

| Previous STI                                                          | Odds Ratio | p-value | 95% CI |       |
|-----------------------------------------------------------------------|------------|---------|--------|-------|
| FIXED EFFECT                                                          |            |         |        |       |
| Age group                                                             |            |         |        |       |
| 18-20                                                                 | ref.       |         |        |       |
| 21-30                                                                 | 1.54       | 0.317   | 0.66   | 3.60  |
| 31-40                                                                 | 2.59       | 0.029   | 1.11   | 6.06  |
| 41-50                                                                 | 2.96       | 0.023   | 1.16   | 7.54  |
| >50                                                                   | 4.78       | 0.006   | 1.57   | 14.52 |
| Number of sexual male partners in the last 12 months                  |            |         |        |       |
| 1                                                                     | ref.       |         |        |       |
| 2-4                                                                   | 0.69       | 0.233   | 0.38   | 1.27  |
| 5-12                                                                  | 1.56       | 0.139   | 0.86   | 2.83  |
| >12                                                                   | 2.43       | 0.004   | 1.32   | 4.44  |
| Frequency of visiting gay clubs, bars, discos to meet sexual partners |            |         |        |       |
| Many times                                                            | 1.10       | 0.757   | 0.61   | 2.00  |
| Sometimes                                                             | 1.54       | 0.165   | 0.84   | 2.81  |
| Rarely                                                                | 0.99       | 0.970   | 0.48   | 2.02  |
| Doesn't visit                                                         |            |         |        |       |
| Popper use before or during last sexual intercourse                   |            |         |        |       |
| No                                                                    | ref.       |         |        |       |
| Yes                                                                   | 1.35       | 0.331   | 0.74   | 2.46  |
| Alcohol use before or during last sexual intercourse                  |            |         |        |       |
| No                                                                    | ref.       |         |        |       |
| Yes                                                                   | 1.28       | 0.250   | 0.84   | 1.94  |
| RANDOM EFFECT                                                         |            |         |        |       |
| Condom use in last sexual intercourse (var)                           | 0.10       |         | 0.01   | 1.21  |
