# Supplementary material
Source: HighWire-hosted journal article supplement (https://bmjopen.bmj.com/content/11/1/e033290)
Supplement: inline-supplementary-material-4 [file inline-supplementary-material-4.pdf]

Tab. 1c Adjusted Odds Ratios from a multivariable logistic regression for self-reported HIV positive serostatus

| HIV positive serostatus                                               | Odds Ratio  | p-value | 95% CI |       |
|-----------------------------------------------------------------------|-------------|---------|--------|-------|
| Age group                                                             |             |         |        |       |
| 18-20                                                                 | ref.        |         |        |       |
| 21-30                                                                 | 1.73        | 0.470   | 0.39   | 7.71  |
| 31-40                                                                 | <b>3.79</b> | 0.076   | 0.87   | 16.56 |
| 41-50                                                                 | <b>6.58</b> | 0.015   | 1.44   | 30.01 |
| >50                                                                   | <b>9.45</b> | 0.007   | 1.86   | 47.89 |
| Number of sexual male partners in the last 12 months                  |             |         |        |       |
| 1                                                                     | ref.        |         |        |       |
| 2-4                                                                   | 1.85        | 0.154   | 0.79   | 4.30  |
| 5-12                                                                  | 1.40        | 0.483   | 0.55   | 3.58  |
| >12                                                                   | <b>3.58</b> | 0.004   | 1.50   | 8.54  |
| Frequency of visiting gay clubs, bars, discos to meet sexual partners |             |         |        |       |
| Many times                                                            | ref.        |         |        |       |
| Sometimes                                                             | <b>0.41</b> | 0.039   | 0.18   | 0.95  |
| Rarely                                                                | 1.15        | 0.720   | 0.54   | 2.42  |
| Doesn't visit                                                         | 1.02        | 0.963   | 0.43   | 2.42  |
| Condom use in last sex intercourse                                    |             |         |        |       |
| No                                                                    | ref.        |         |        |       |
| Yes                                                                   | 1.35        | 0.383   | 0.69   | 2.63  |
| Popper use before or during last sex intercourse                      |             |         |        |       |
| No                                                                    | ref.        |         |        |       |
| Yes                                                                   | <b>2.07</b> | 0.059   | 0.97   | 4.41  |
| Alcohol use before or during last sex intercourse                     |             |         |        |       |
| No                                                                    | ref.        |         |        |       |
| Yes                                                                   | 0.66        | 0.186   | 0.35   | 1.23  |

Tab. 2c Adjusted Odds Ratios from a multivariable MIXED EFFECT logistic regression for self-reported HIV positive serostatus with age group as a random effect

| HIV positive serostatus                                               | Odds Ratio | p-value | 95% CI |      |
|-----------------------------------------------------------------------|------------|---------|--------|------|
| FIXED EFFECT                                                          |            |         |        |      |
| Number of sexual male partners in the last 12 months                  |            |         |        |      |
| 1                                                                     | ref.       |         |        |      |
| 2-4                                                                   | 1.85       | 0.153   | 0.80   | 4.30 |
| 5-12                                                                  | 1.42       | 0.468   | 0.55   | 3.62 |
| >12                                                                   | 3.69       | 0.003   | 1.54   | 8.81 |
| Frequency of visiting gay clubs, bars, discos to meet sexual partners |            |         |        |      |
| Many times                                                            | ref.       |         |        |      |
| Sometimes                                                             | 0.42       | 0.045   | 0.18   | 0.98 |
| Rarely                                                                | 1.18       | 0.661   | 0.56   | 2.50 |
| Doesn't visit                                                         | 1.09       | 0.842   | 0.46   | 2.58 |
| Condom use in last sex intercourse                                    |            |         |        |      |
| No                                                                    | ref.       |         |        |      |
| Yes                                                                   | 1.33       | 0.399   | 0.68   | 2.60 |
| Popper use before or during last sex intercourse                      |            |         |        |      |
| No                                                                    | ref.       |         |        |      |
| Yes                                                                   | 2.02       | 0.067   | 0.95   | 4.29 |
| Alcohol use before or during last sex intercourse                     |            |         |        |      |
| No                                                                    | ref.       |         |        |      |
| Yes                                                                   | 0.66       | 0.189   | 0.35   | 1.23 |
| RANDOM EFFECT                                                         |            |         |        |      |
| AGE GROUP (var)                                                       | 0.40       |         | 0.07   | 2.42 |

Tab. 3c Adjusted Odds Ratios from a multivariable MIXED EFFECT logistic regression for self-reported HIV positive serostatus with number of sexual male partners in the last 12 months as a random effect

| HIV positive serostatus                                               | Odds Ratio | p-value | 95% CI |       |
|-----------------------------------------------------------------------|------------|---------|--------|-------|
| FIXED EFFECT                                                          |            |         |        |       |
| Age group                                                             |            |         |        |       |
| 18-20                                                                 | ref.       |         |        |       |
| 21-30                                                                 | 1.80       | 0.439   | 0.41   | 8.01  |
| 31-40                                                                 | 4.03       | 0.064   | 0.92   | 17.60 |
| 41-50                                                                 | 6.93       | 0.012   | 1.52   | 31.56 |
| >50                                                                   | 9.80       | 0.006   | 1.94   | 49.60 |
| Frequency of visiting gay clubs, bars, discos to meet sexual partners |            |         |        |       |
| Many times                                                            | ref.       |         |        |       |
| Sometimes                                                             | 0.41       | 0.038   | 0.18   | 0.95  |
| Rarely                                                                | 1.10       | 0.796   | 0.52   | 2.33  |
| Doesn't visit                                                         | 0.91       | 0.824   | 0.38   | 2.14  |
| Condom use in last sex intercourse                                    |            |         |        |       |
| No                                                                    | ref.       |         |        |       |
| Yes                                                                   | 1.45       | 0.276   | 0.74   | 2.81  |
| Popper use before or during last sex intercourse                      |            |         |        |       |
| No                                                                    | ref.       |         |        |       |
| Yes                                                                   | 2.24       | 0.036   | 1.05   | 4.78  |
| Alcohol use before or during last sex intercourse                     |            |         |        |       |
| No                                                                    | ref.       |         |        |       |
| Yes                                                                   | 0.66       | 0.197   | 0.36   | 1.24  |
| RANDOM EFFECT                                                         |            |         |        |       |
| Number of sexual male partners in the last 12 months (var)            | 0.14       |         | 0.02   | 1.21  |

Tab. 4c Adjusted Odds Ratios from a multivariable MIXED EFFECT logistic regression for self-reported HIV positive serostatus with frequency of visiting gay clubs, bars, discos to meet sexual partners as a random effect

| HIV positive serostatus                                                     | Odds Ratio  | p-value | 95% CI |       |
|-----------------------------------------------------------------------------|-------------|---------|--------|-------|
| FIXED EFFECT                                                                |             |         |        |       |
| Age group                                                                   |             |         |        |       |
| 18-20                                                                       | ref.        |         |        |       |
| 21-30                                                                       | 1.71        | 0.482   | 0.38   | 7.59  |
| 31-40                                                                       | <b>3.72</b> | 0.080   | 0.85   | 16.22 |
| 41-50                                                                       | <b>6.55</b> | 0.015   | 1.44   | 29.86 |
| >50                                                                         | <b>9.43</b> | 0.007   | 1.87   | 47.53 |
| Number of Partner                                                           |             |         |        |       |
| 1                                                                           | ref.        |         |        |       |
| 2-4                                                                         | 1.82        | 0.165   | 0.78   | 4.22  |
| 5-12                                                                        | 1.34        | 0.539   | 0.53   | 3.39  |
| >12                                                                         | <b>3.32</b> | 0.006   | 1.41   | 7.83  |
| Condom use last sex intercourse                                             |             |         |        |       |
| No                                                                          | ref.        | 0.757   | 0.61   | 2.00  |
| Yes                                                                         | 1.32        | 0.411   | 0.68   | 2.57  |
| Popper use last sex intercourse                                             |             |         |        |       |
| No                                                                          | ref.        |         |        |       |
| Yes                                                                         | <b>2.05</b> | 0.061   | 0.97   | 4.35  |
| Alcohol use last sex intercourse                                            |             |         |        |       |
| No                                                                          | ref.        |         |        |       |
| Yes                                                                         | 0.63        | 0.149   | 0.34   | 1.18  |
| RANDOM EFFECT                                                               |             |         |        |       |
| Frequency of visiting gay clubs, bars, discos to meet sexual partners (var) | <b>0.09</b> |         | 0.01   | 1.02  |
